# Supplementary material for: Alcohol Triggers the Accumulation of Oxidatively Damaged Proteins in Neuronal Cells and Tissues
Source: MDPI journal article supplement (doi:10.3390/antiox13050580), 2024-05-08
Supplement: s1 [file s1]

## Supplementary Data.

**Supplementary Table S1:** Demographics of the human brain samples.

| Identifier | Psychiatric diagnosis | Age (years) | Gender (F/M) | PMD (h) | Cause of death | Ethanol in blood (mg/mL) | Other drugs in blood |
|------------|-----------------------|-------------|--------------|---------|----------------|--------------------------|----------------------|
| <b>C1</b>  | None                  | 66          | M            | 50      | Accident       | 0                        | (-)                  |
| <b>A1</b>  | Alcoholism            | 71          | M            | 17      | Accident       | 0.35                     | (-)                  |
| <b>C2</b>  | Bipolar               | 50          | M            | 6       | Suicide        | 0                        | Diazepam             |
| <b>A2</b>  | Alcoholism            | 50          | M            | 3       | Suicide        | 0                        | (-)                  |
| <b>C3</b>  | Anxiety               | 44          | M            | 15      | Suicide        | 0                        | (-)                  |
| <b>A3</b>  | Alcoholism            | 40          | M            | 21      | Suicide        | 0                        | (-)                  |
| <b>C4</b>  | Depression            | 58          | F            | 48      | Suicide        | Not determined           | Not determined       |
| <b>A4</b>  | Alcoholism            | 57          | F            | 24      | Suicide        | 0.23                     | Methanol             |
| <b>C5</b>  | Anxiety               | 48          | F            | 9       | Suicide        | 0                        | Ephedrine            |
| <b>A5</b>  | Alcoholism            | 50          | F            | 6       | Suicide        | 0                        | Hydrochlorothiazide  |
| <b>C6</b>  | OCD                   | 65          | M            | 19      | Suicide        | 0                        | Nodiazepam           |
| <b>A6</b>  | Alcoholism            | 71          | M            | 19      | Suicide        | 0.55                     | (-)                  |

Abbreviations: PMD, post-mortem delay.

**Supplementary Table S2:** Alcohol toxicity to undifferentiated and differentiated SH-SY5Y

cells measured by a MTT assay.

| Cell type        | Treatments (mM) | 3 h vs 6 h | 3 h vs 12 h | 3 h vs 24 h | 6 h vs 12 h | 6 h vs 24 h | 12 h vs 24 h |
|------------------|-----------------|------------|-------------|-------------|-------------|-------------|--------------|
| Undifferentiated | 10              | NS         | NS          | NS          | NS          | NS          | NS           |
|                  | 20              | NS         | NS          | <0.0001     | NS          | <0.0001     | <0.0001      |
|                  | 50              | NS         | <0.0001     | <0.0001     | <0.0001     | <0.0001     | 0.0067       |
|                  | 100             | NS         | <0.0001     | <0.0001     | <0.0001     | <0.0001     | NS           |
|                  | 200             | NS         | <0.0001     | 0.0007      | 0.0003      | 0.0437      | NS           |
| Differentiated   | 10              | NS         | NS          | NS          | NS          | NS          | NS           |
|                  | 20              | NS         | NS          | NS          | NS          | NS          | NS           |
|                  | 50              | NS         | 0.0085      | <0.0001     | 0.0122      | <0.0001     | 0.0037       |
|                  | 100             | NS         | 0.0483      | 0.0061      | NS          | NS          | NS           |
|                  | 200             | NS         | <0.0001     | <0.0001     | <0.0001     | <0.0001     | NS           |

Abbreviations: NS, non-significant (>0.05).

**Supplementary Table S3:** A comparison of the effects of alcohol on undifferentiated vs differentiated SHSY-5Y cells.

|                        |                           | Undifferentiated vs differentiated SH-SY5Y cells |           |           |           |           |
|------------------------|---------------------------|--------------------------------------------------|-----------|-----------|-----------|-----------|
| Alcohol treatment (mM) | Exposure time point (hrs) | MTT assay                                        | LDH assay | ATP assay | ROS assay | PCC assay |
| <b>10</b>              | 3                         | 0.0075                                           | NS        | <0.0001   | NS        | NS        |
|                        | 6                         | NS                                               | NS        | <0.0001   | NS        | NS        |
|                        | 12                        | NS                                               | NS        | 0.0004    | NS        | <0.0001   |
|                        | 24                        | 0.0161                                           | NS        | NS        | NS        | NS        |
| <b>20</b>              | 3                         | NS                                               | NS        | <0.0001   | <0.0001   | NS        |
|                        | 6                         | NS                                               | NS        | 0.0002    | <0.0001   | NS        |
|                        | 12                        | NS                                               | 0.0026    | <0.0001   | NS        | NS        |
|                        | 24                        | <0.0001                                          | <0.0001   | NS        | 0.0016    | NS        |
| <b>50</b>              | 3                         | NS                                               | 0.0001    | <0.0001   | <0.0001   | NS        |
|                        | 6                         | NS                                               | NS        | 0.0138    | <0.0001   | NS        |
|                        | 12                        | <0.0001                                          | <0.0001   | <0.0001   | NS        | 0.0035    |
|                        | 24                        | 0.0002                                           | <0.0001   | 0.0098    | NS        | 0.0004    |
| <b>100</b>             | 3                         | NS                                               | <0.0001   | NS        | <0.0001   | NS        |
|                        | 6                         | 0.0493                                           | <0.0001   | NS        | <0.0001   | NS        |
|                        | 12                        | <0.0001                                          | 0.0070    | <0.0001   | <0.0001   | <0.0001   |
|                        | 24                        | <0.0001                                          | 0.0278    | NS        | <0.0001   | 0.0028    |
| <b>200</b>             | 3                         | NS                                               | 0.0342    | NS        | <0.0001   | NS        |
|                        | 6                         | 0.0120                                           | NS        | NS        | <0.0001   | <0.0001   |
|                        | 12                        | NS                                               | NS        | NS        | <0.0001   | NS        |
|                        | 24                        | NS                                               | NS        | NS        | <0.0001   | 0.0391    |

Abbreviations: NS, non-significant (>0.05).

**Supplementary Table S4:** Alcohol toxicity to undifferentiated and differentiated SH-SY5Y cells measured by a LDH assay.

| Cell type        | Treatments (mM) | 3 h vs 6 h | 3 h vs 12 h | 3 h vs 24 h | 6 h vs 12 h | 6 h vs 24 h | 12 h vs 24 h |
|------------------|-----------------|------------|-------------|-------------|-------------|-------------|--------------|
| Undifferentiated | 10              | NS         | NS          | NS          | NS          | NS          | NS           |
|                  | 20              | NS         | NS          | <0.0001     | NS          | <0.0001     | <0.0001      |
|                  | 50              | NS         | <0.0001     | <0.0001     | <0.0001     | <0.0001     | 0.0007       |
|                  | 100             | NS         | <0.0001     | <0.0001     | <0.0001     | <0.0001     | NS           |
|                  | 200             | NS         | <0.0001     | <0.0001     | <0.0001     | <0.0001     | NS           |
| Differentiated   | 10              | NS         | NS          | NS          | NS          | NS          | NS           |
|                  | 20              | NS         | NS          | 0.0015      | NS          | NS          | NS           |
|                  | 50              | NS         | <0.0001     | <0.0001     | 0.0037      | <0.0001     | 0.0318       |
|                  | 100             | <0.0001    | <0.0001     | <0.0001     | <0.0001     | <0.0001     | 0.0029       |
|                  | 200             | 0.0002     | <0.0001     | <0.0001     | NS          | NS          | NS           |

Abbreviations: NS, non-significant (>0.05).

**Supplementary Table S5:** Neurite reduction in response to alcohol treatment.

| Cell Type      | Treatment duration (hours) | Neurite reduction |                |
|----------------|----------------------------|-------------------|----------------|
|                |                            | IC <sub>50</sub>  | R <sup>2</sup> |
| Differentiated | 3                          | Not observable    | -              |
| Differentiated | 6                          | 121.4 ± 7.6       | 0.8383         |
| Differentiated | 12                         | 79.0 ± 3.2        | 0.9272         |
| Differentiated | 24                         | 53.72 ± 7.5       | 0.8383         |

The concentration of alcohol producing 50% (IC<sub>50</sub>) neurite reduction was calculated by non-linear regression.

**Supplementary Table S6:** Alcohol toxicity to undifferentiated and differentiated SH-SY5Y

cells measured by a LDH assay.

| Cell type        | Treatments<br>(mM) | 3 h vs 6 h | 3 h vs 12 h | 3 h vs 24 h | 6 h vs 12 h | 6 h vs 24 h | 12 h vs 24 h |
|------------------|--------------------|------------|-------------|-------------|-------------|-------------|--------------|
| Undifferentiated | 10                 | NS         | NS          | NS          | NS          | NS          | NS           |
|                  | 20                 | NS         | 0.0004      | NS          | 0.0039      | NS          | NS           |
|                  | 50                 | NS         | <0.0001     | <0.0001     | <0.0001     | <0.0001     | 0.0013       |
|                  | 100                | 0.0381     | <0.0001     | <0.0001     | <0.0001     | <0.0001     | 0.5266       |
|                  | 200                | NS         | <0.0001     | 0.0019      | <0.0001     | 0.0334      | NS           |
| Differentiated   | 10                 | NS         | 0.0035      | NS          | 0.0002      | NS          | NS           |
|                  | 20                 | NS         | NS          | NS          | NS          | NS          | NS           |
|                  | 50                 | NS         | <0.0001     | <0.0001     | 0.0003      | <0.0001     | <0.0001      |
|                  | 100                | NS         | <0.0001     | <0.0001     | <0.0001     | <0.0001     | 0.0008       |
|                  | 200                | NS         | <0.0001     | <0.0001     | <0.0001     | <0.0001     | NS           |

Abbreviations: NS, non-significant (>0.05).

**Supplementary Table S7:** Alcohol induction of ROS in undifferentiated and differentiated

SH-SY5Y cells measured by a DCFDA assay.

| Cell type        | Treatments<br>(mM) | 3 h vs 6 h | 3 h vs 12 h | 3 h vs 24 h | 6 h vs 12 h | 6 h vs 24 h | 12 h vs 24 h |
|------------------|--------------------|------------|-------------|-------------|-------------|-------------|--------------|
| Undifferentiated | 10                 | NS         | NS          | NS          | NS          | NS          | NS           |
|                  | 20                 | NS         | NS          | NS          | NS          | NS          | NS           |
|                  | 50                 | 0.0297     | 0.0038      | 0.0006      | <0.0001     | <0.0001     | NS           |
|                  | 100                | NS         | NS          | NS          | NS          | NS          | NS           |
|                  | 200                | NS         | NS          | 0.0058      | NS          | 0.0004      | 0.0386       |
| Differentiated   | 10                 | NS         | NS          | NS          | NS          | NS          | NS           |
|                  | 20                 | <0.0001    | <0.0001     | NS          | NS          | <0.0001     | <0.0001      |
|                  | 50                 | <0.0001    | <0.0001     | 0.0160      | NS          | <0.0001     | <0.0001      |
|                  | 100                | <0.0001    | <0.0001     | 0.0039      | NS          | <0.0001     | 0.0008       |
|                  | 200                | <0.0001    | <0.0001     | 0.0111      | NS          | <0.0001     | <0.0001      |

Abbreviations: NS, non-significant ( $>0.05$ ).

**Supplementary Table S8:** Correlation between the levels of ROS and protein carbonyl content in response to alcohol exposures.

| Cell Type        | Treatment duration (hours) | ROS vs PCC |                |                |
|------------------|----------------------------|------------|----------------|----------------|
|                  |                            | <i>r</i>   | R <sup>2</sup> | <i>P</i> value |
| Undifferentiated | 3                          | 0.4874     | 0.2375         | NS             |
| Differentiated   |                            | 0.5758     | 0.3315         | NS             |
| Undifferentiated | 6                          | 0.7193     | 0.5175         | NS             |
| Differentiated   |                            | 0.8584     | 0.7369         | NS             |
| Undifferentiated | 12                         | 0.9940     | 0.9881         | 0.0006         |
| Differentiated   |                            | 0.8624     | 0.7437         | NS             |
| Undifferentiated | 24                         | 0.9592     | 0.9200         | 0.0098         |
| Differentiated   |                            | 0.9579     | 0.9175         | 0.0103         |

Abbreviations: NS, non-significant (>0.05). *r*, Pearson's correlation coefficient.

**Supplementary Figure S1:** Treatment of undifferentiated and differentiated SHSY-5Y cells with alcohol.

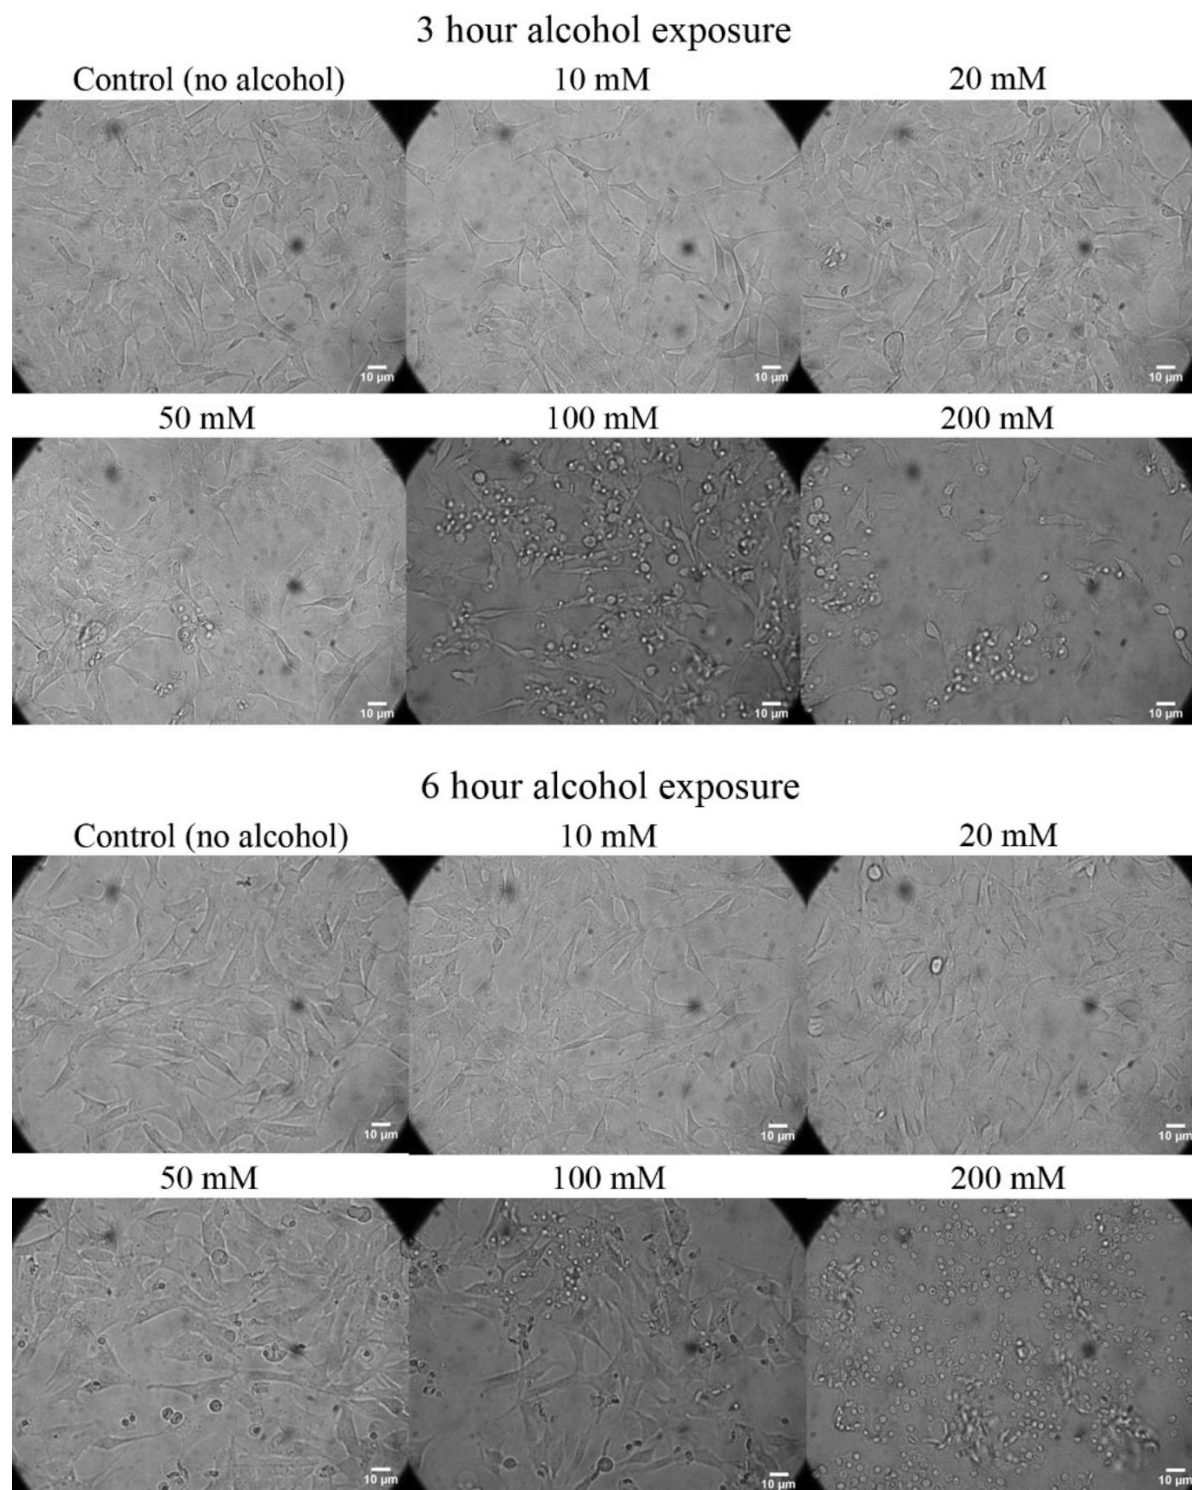

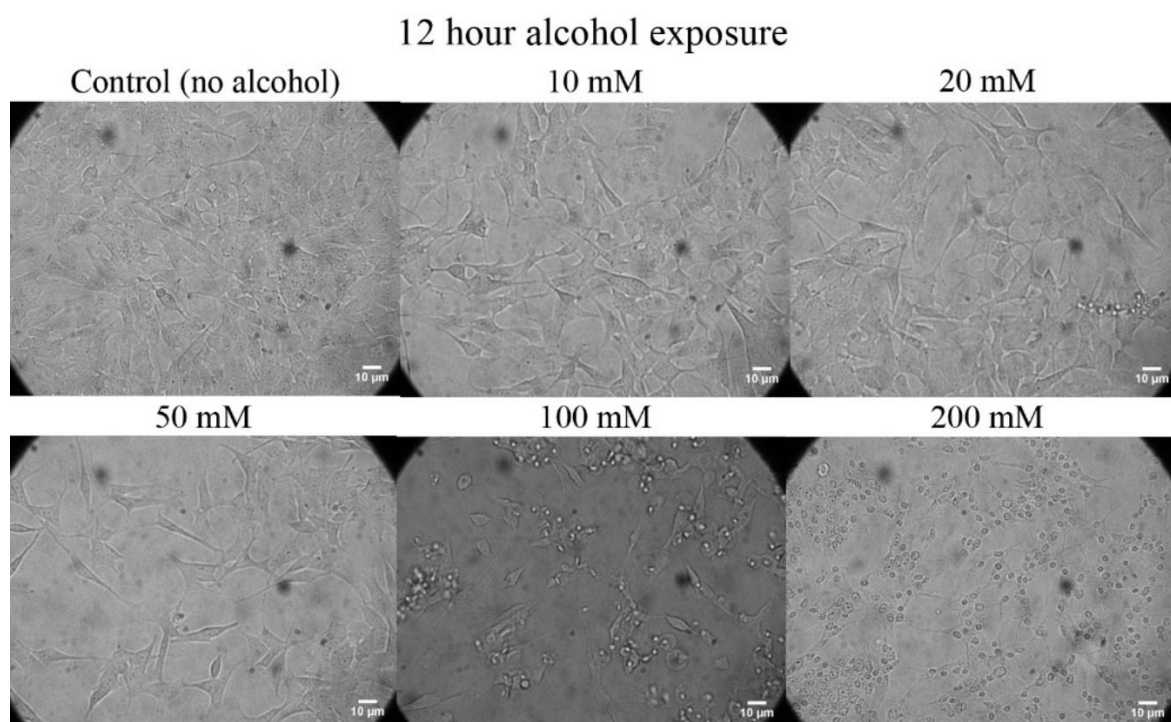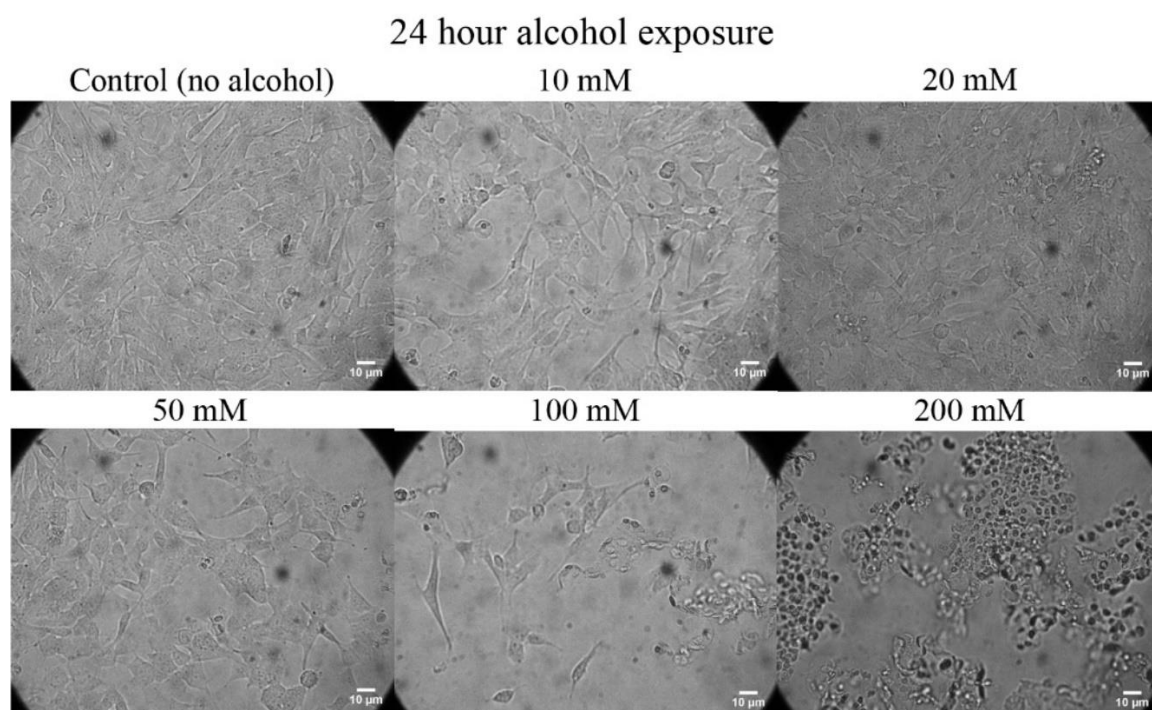

Undifferentiated SH-SY5Y cells were treated with 0–200 mM alcohol for 3, 6, 12, and 24 hours, and images captured using a phase contrast microscope. Scale bar: 10  $\mu$ m.



### 3 hour alcohol exposure

Control (no alcohol)

10 mM

20 mM

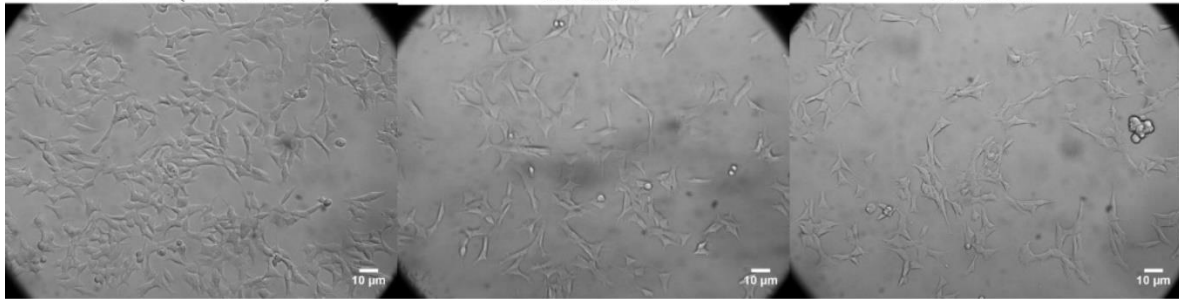

50 mM

100 mM

200 mM

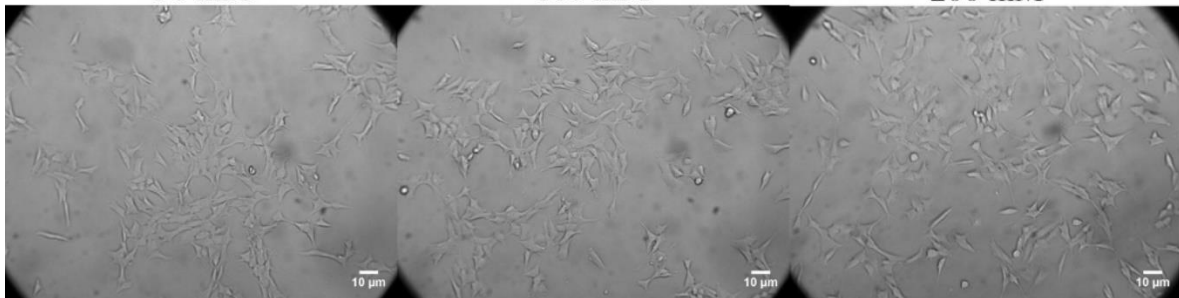

### 6 hour alcohol exposure

Control (no alcohol)

10 mM

20 mM

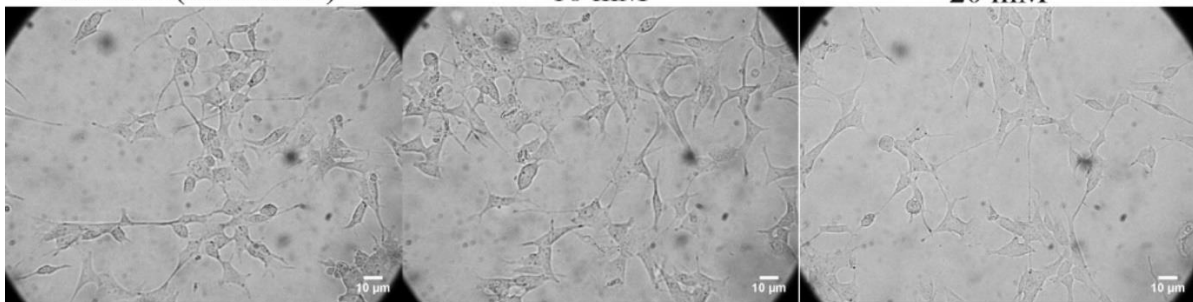

50 mM

100 mM

200 mM

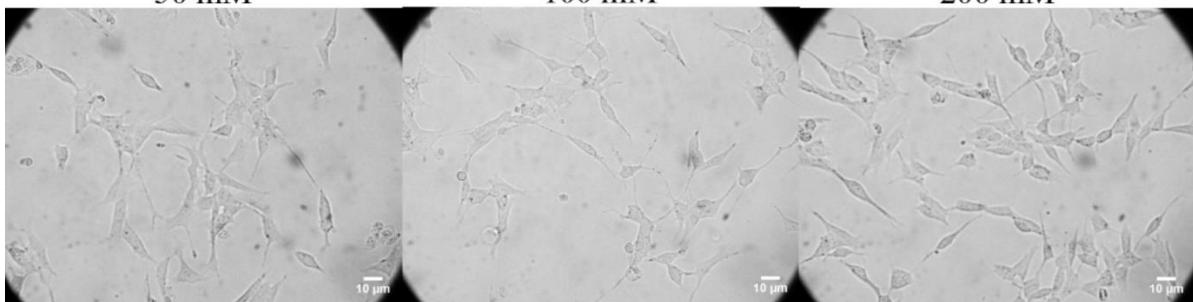

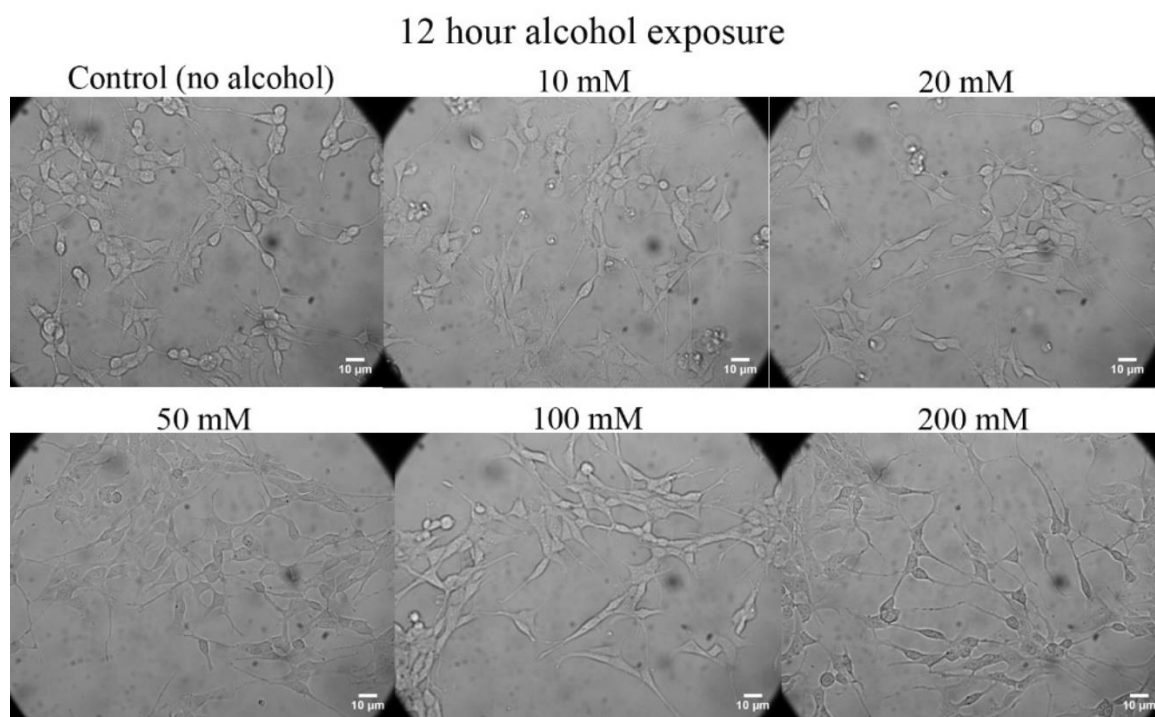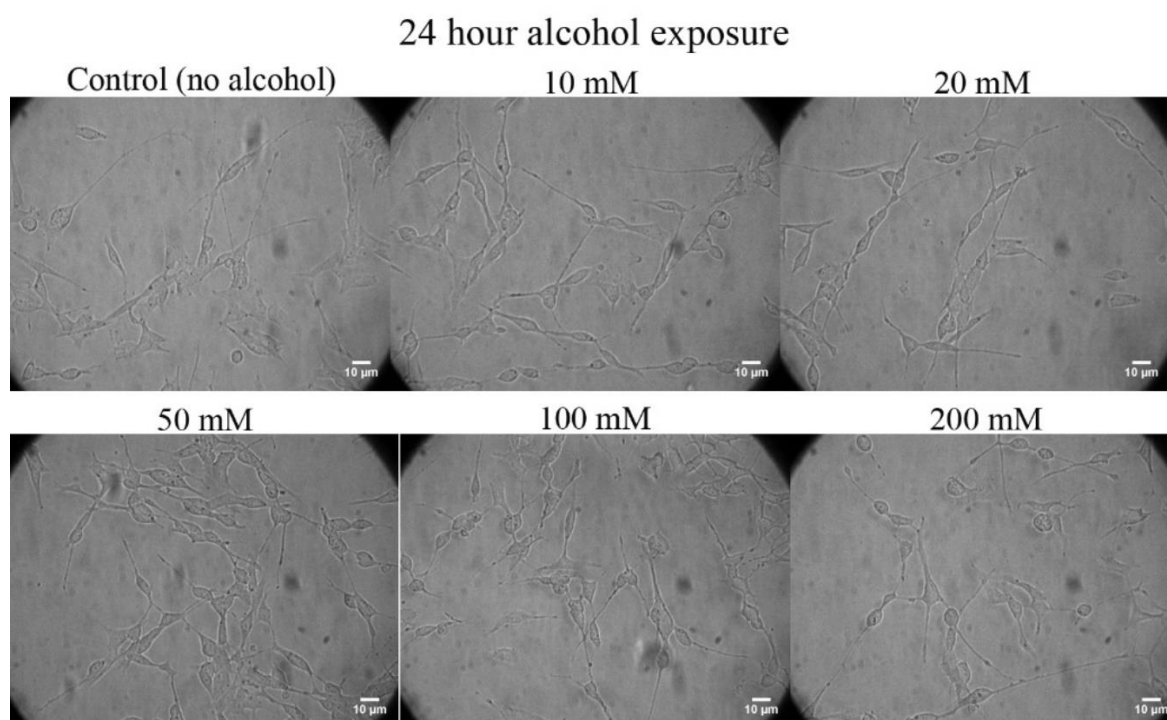

SH-SY5Y cells were differentiated in the presence of 0–200 mM alcohol for 3, 6, 12, and 24 hours, and images captured using a phase contrast microscope. Scale bar: 10  $\mu$ m.

**Supplementary Figure S2: Samples of original Western oxy-blots:**

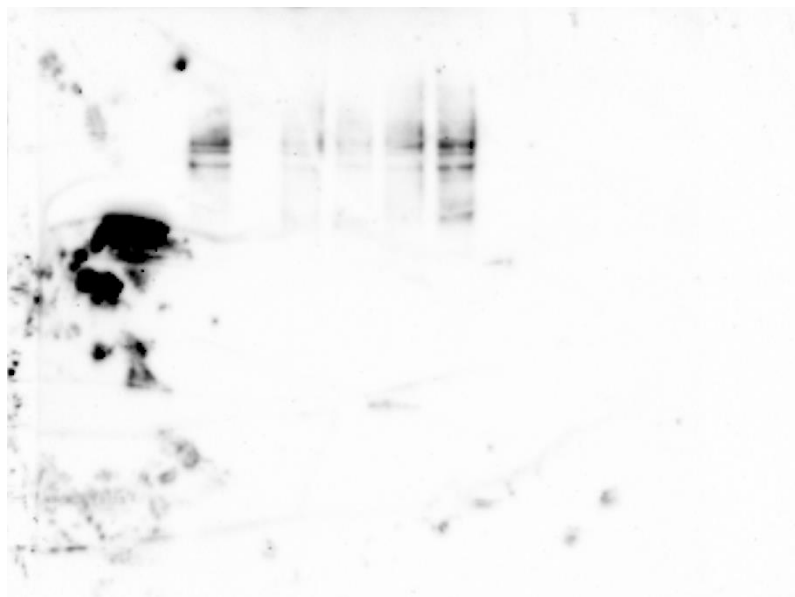

Full unedited blot for Figure 8 (left panel)

Lane 1, brain extract; Lane 2, 10 mM alcohol; Lane 3, 20 mM alcohol; Lane 4, 50 mM alcohol; Lane 5, 100 mM alcohol; Lane 6, 200 mM alcohol.

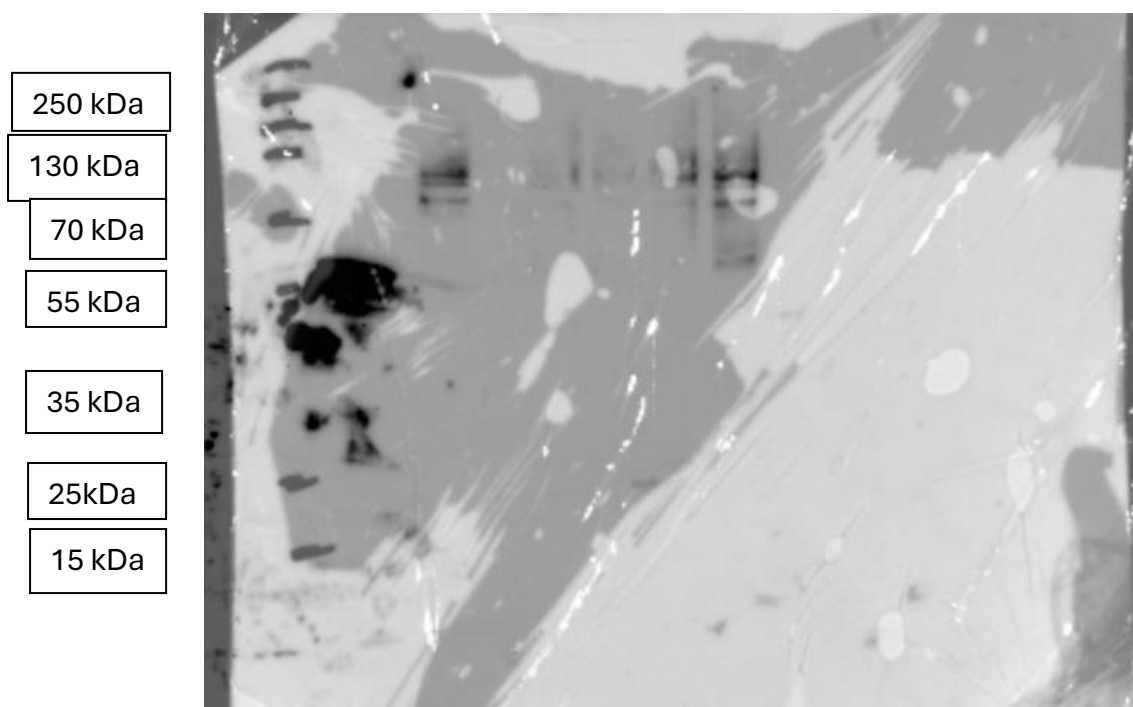

Full original unedited autoexposed blot used for Figure 8 (left panel) with blot co-exposed with markers for protein band sizing.

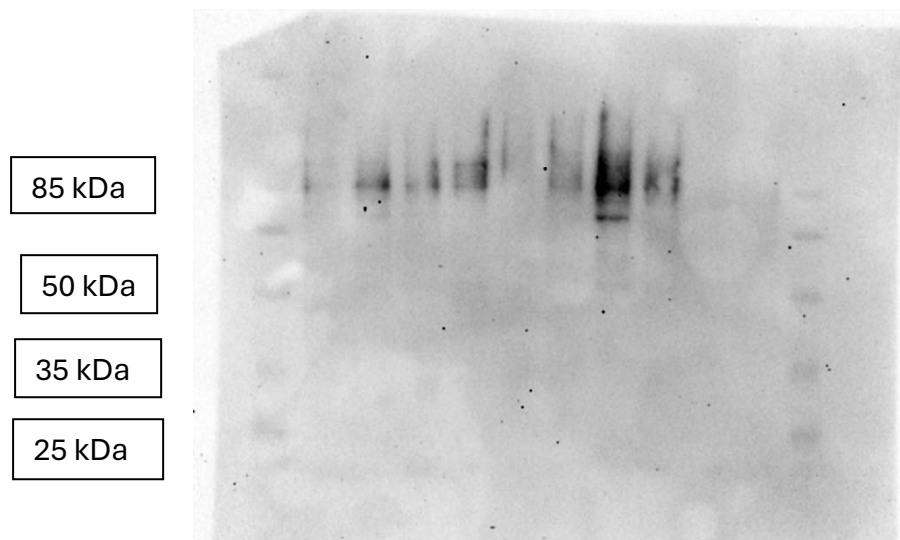

Full original unedited autoexposed blot used for Figure 8 (right panel). Lanes 1-5 used for the manuscript.

Lane 1, molecular weight markers; Lane 2, control brain 1; Lane 3, alcoholic brain 1; Lane 4, control brain 2; Lane 5, alcoholic brain 2; Lane 6, control brain 3; Lane 7, alcoholic brain 3; Lane 8, control brain 4; Lane 9, alcoholic brain 4; Lane 10, control brain 5; Lane 11, alcoholic brain 5; Lane 12, molecular weight markers.
